# Supplementary material for: Can public health policies on alcohol and tobacco reduce a cancer epidemic? Australia's experience
Source: BMC Med. 2019 Nov 27;17:213. doi: 10.1186/s12916-019-1453-z (PMC6880568; doi:10.1186/s12916-019-1453-z)
Supplement: Supplementary file 2 — Additional file 2. STROBE checklist. [file 12916_2019_1453_MOESM2_ESM.doc]

STROBE Statement—checklist of items that should be included in reports of observational studies

|  | Item No | Recommendation |
| --- | --- | --- |
| **Title and abstract** | 1 | (*a*) Indicate the study’s design with a commonly used term in the title or the abstract ✓**Yes, please see page 2 in the track change version.** |
| (*b*) Provide in the abstract an informative and balanced summary of what was done and what was found✓**Yes, in page 2** |
| Introduction | | |
| Background/rationale | 2 | Explain the scientific background and rationale for the investigation being reported ✓**Yes in pages 4-5, Introduction** |
| Objectives | 3 | State specific objectives, including any prespecified hypotheses ✓**Yes, in pages 4-5, Introduction** |
| Methods | | |
| Study design | 4 | Present key elements of study design early in the paper ✓**Yes, in ages 6** |
| Setting | 5 | Describe the setting, locations, and relevant dates, including periods of recruitment, exposure, follow-up, and data collection ✓**Yes, this is a population based long-term time series analysis, the location is the whole Australia, and period is between 1950 to 2013. Dare were collected from response agencies. In pages 6-7.** |
| Participants | 6 | (*a*) *Cohort study*—Give the eligibility criteria, and the sources and methods of selection of participants. Describe methods of follow-up ✓**Yes, it is a population-based study. The cohort group is the Australian population aged 15 and over. In pages 6-7.**  *Case-control study*—Give the eligibility criteria, and the sources and methods of case ascertainment and control selection. Give the rationale for the choice of cases and controls  *Cross-sectional study*—Give the eligibility criteria, and the sources and methods of selection of participants |
| (*b*)*Cohort study*—For matched studies, give matching criteria and number of exposed and unexposed  *Case-control study*—For matched studies, give matching criteria and the number of controls per case |
| Variables | 7 | Clearly define all outcomes, exposures, predictors, potential confounders, and effect modifiers. Give diagnostic criteria, if applicable ✓**Yes, in pages 6-8.** |
| Data sources/ measurement | 8* | For each variable of interest, give sources of data and details of methods of assessment (measurement). Describe comparability of assessment methods if there is more than one group ✓**Yes, in pages 6-7, Data section.** |
| Bias | 9 | Describe any efforts to address potential sources of bias ✓**Yes, the potential sources of bias were described in pages 8-9 and in Additional File 1 as well, Description of cancer mortality data (ICD-10).** |
| Study size | 10 | Explain how the study size was arrived at ✓**Yes, the men and women aged 15 and over across the population. We collected population-based time series data for as long as it available.** |
| Quantitative variables | 11 | Explain how quantitative variables were handled in the analyses. If applicable, describe which groupings were chosen and why ✓**Yes, in paged 6-7. We chose five specific types of cancer mortality for both men and women which highly related to alcohol and tobacco consumption based on previous epidemiological studies.** |
| Statistical methods | 12 | (*a*) Describe all statistical methods, including those used to control for confounding ✓**Yes, in pages 7-9.** |
| (*b*) Describe any methods used to examine subgroups and interactions ✓**Yes, pages 7-8.** |
| (*c*) Explain how missing data were addressed ✓**no missing data in our analysis** |
| (*d*) *Cohort study*—If applicable, explain how loss to follow-up was addressed  *Case-control study*—If applicable, explain how matching of cases and controls was addressed  *Cross-sectional study*—If applicable, describe analytical methods taking account of sampling strategy |
| (*e*) Describe any sensitivity analyses **Not applicable** |

Continued on next page

| Results | | |
| --- | --- | --- |
| Participants | 13* | (a) Report numbers of individuals at each stage of study—eg numbers potentially eligible, examined for eligibility, confirmed eligible, included in the study, completing follow-up, and analysed **Not applicable** |
| (b) Give reasons for non-participation at each stage **Not applicable** |
| (c) Consider use of a flow diagram **Not applicable** |
| Descriptive data | 14* | (a) Give characteristics of study participants (eg demographic, clinical, social) and information on exposures and potential confounders **Not applicable** |
| (b) Indicate number of participants with missing data for each variable of interest **Not applicable** |
| (c) *Cohort study*—Summarise follow-up time (eg, average and total amount) **Not applicable** |
| Outcome data | 15* | *Cohort study*—Report numbers of outcome events or summary measures over time ✓**Yes, in pages 10-13** |
| *Case-control study—*Report numbers in each exposure category, or summary measures of exposure |
| *Cross-sectional study—*Report numbers of outcome events or summary measures |
| Main results | 16 | (*a*) Give unadjusted estimates and, if applicable, confounder-adjusted estimates and their precision (eg, 95% confidence interval). Make clear which confounders were adjusted for and why they were included ✓**Yes, in pages 9-10** |
| (*b*) Report category boundaries when continuous variables were categorized **Not applicable** |
| (*c*) If relevant, consider translating estimates of relative risk into absolute risk for a meaningful time period **Not applicable** |
| Other analyses | 17 | Report other analyses done—eg analyses of subgroups and interactions, and sensitivity analyses ✓**Yes, in pages9-10, jointed and separate models for men and women’s cancer mortality rates** |
| Discussion | | |
| Key results | 18 | Summarise key results with reference to study objectives ✓**Yes, pages 13-14** |
| Limitations | 19 | Discuss limitations of the study, taking into account sources of potential bias or imprecision. Discuss both direction and magnitude of any potential bias ✓**Yes, page 17** |
| Interpretation | 20 | Give a cautious overall interpretation of results considering objectives, limitations, multiplicity of analyses, results from similar studies, and other relevant evidence ✓**Yes, pages 15-16** |
| Generalisability | 21 | Discuss the generalisability (external validity) of the study results ✓**Yes, pages 13-16** |
| Other information | | |
| Funding | 22 | Give the source of funding and the role of the funders for the present study and, if applicable, for the original study on which the present article is based ✓**Yes, page 20** |

*Give information separately for cases and controls in case-control studies and, if applicable, for exposed and unexposed groups in cohort and cross-sectional studies.

**Note:** An Explanation and Elaboration article discusses each checklist item and gives methodological background and published examples of transparent reporting. The STROBE checklist is best used in conjunction with this article (freely available on the Web sites of PLoS Medicine at http://www.plosmedicine.org/, Annals of Internal Medicine at http://www.annals.org/, and Epidemiology at http://www.epidem.com/). Information on the STROBE Initiative is available at www.strobe-statement.org.
